# Supplementary material for: Diffusion characteristics of water molecules in a lamellar structure formed by triblock copolymers
Source: Royal Society of Chemistry journal article supplement (doi:10.1039/d2cp00207h), 2022-01-01
Supplement: d2cp00207h1.pdf [file d2cp00207h1.pdf]

### Supplementary Information

## Diffusion Characteristics of Water Molecules in a Lamellar Structure Formed by Triblock Copolymers

Zhe Zhang<sup>1,2</sup>, Youngkyu Han<sup>1</sup>, Wei-Ren Chen<sup>1</sup>, Changwoo Do<sup>1,\*</sup>

<sup>1</sup>Neutron Scattering Division, Oak Ridge National Laboratory, Oak Ridge, Tennessee 37831, USA;

<sup>2</sup>Forschungszentrum Jülich, Jülich Center for Neutron Science, Outstation at the Spallation Neutron Source (SNS), Oak Ridge National Laboratory, Oak Ridge Tennessee 37831, USA

**Table S1** The generalized diffusion coefficient ( $[D] = [\text{Å}^2/\text{ps}^\alpha]$ ) and subdiffusive exponent.

| Layer ID | $D_x$ | $errD_x$ | $\alpha_x$ | $err\alpha_x$ | $D_y$ | $errD_y$ | $\alpha_y$ | $err\alpha_y$ | $D_z$ | $errD_z$ | $\alpha_z$ | $err\alpha_z$ |
|----------|-------|----------|------------|---------------|-------|----------|------------|---------------|-------|----------|------------|---------------|
| L1       | 1.54  | 0.00     | 1.00       | 0.00          | 1.54  | 0.00     | 1.00       | 0.00          | 1.08  | 0.02     | 1.02       | 0.01          |
| L2       | 1.48  | 0.00     | 0.96       | 0.00          | 1.50  | 0.01     | 0.96       | 0.00          | 0.98  | 0.01     | 0.98       | 0.01          |
| L3       | 1.33  | 0.02     | 0.71       | 0.00          | 1.32  | 0.02     | 0.72       | 0.00          | 0.67  | 0.00     | 0.75       | 0.00          |
| L4       | 0.80  | 0.01     | 0.47       | 0.00          | 0.78  | 0.01     | 0.49       | 0.00          | 0.40  | 0.00     | 0.53       | 0.00          |
| L5       | 0.52  | 0.01     | 0.38       | 0.00          | 0.55  | 0.01     | 0.37       | 0.00          | 0.32  | 0.01     | 0.44       | 0.01          |
| L6       | 0.49  | 0.01     | 0.45       | 0.01          | 0.51  | 0.01     | 0.45       | 0.01          | 0.31  | 0.00     | 0.45       | 0.01          |
| L7       | 0.92  | 0.01     | 0.54       | 0.00          | 0.92  | 0.01     | 0.54       | 0.00          | 0.46  | 0.00     | 0.59       | 0.00          |
| L8       | 1.40  | 0.02     | 0.80       | 0.00          | 1.41  | 0.02     | 0.80       | 0.00          | 0.76  | 0.00     | 0.83       | 0.00          |
| L9       | 1.53  | 0.01     | 0.97       | 0.00          | 1.55  | 0.01     | 0.97       | 0.00          | 1.02  | 0.01     | 0.99       | 0.01          |
| L10      | 1.56  | 0.00     | 1.00       | 0.00          | 1.58  | 0.01     | 1.00       | 0.00          | 1.13  | 0.04     | 0.98       | 0.02          |

**Table S2** The diffusion coefficient ( $\times 10^{-5} \text{ cm}^2/\text{s}$ ) by linear fit ( $\langle r^2(t) \rangle = 2Dt$ ), within  $t < 8$  ps.

| Layer ID | $D_x$ | $Err. D_x$ | $D_y$ | $Err. D_y$ | $D_z$ | $Err. D_z$ |
|----------|-------|------------|-------|------------|-------|------------|
| L1       | 7.75  | 0.01       | 7.74  | 0.01       | 5.71  | 0.03       |
| L2       | 6.90  | 0.02       | 6.90  | 0.02       | 4.75  | 0.01       |
| L3       | 3.86  | 0.11       | 3.87  | 0.11       | 2.14  | 0.07       |
| L8       | 4.76  | 0.09       | 4.80  | 0.09       | 2.81  | 0.06       |
| L9       | 7.21  | 0.01       | 7.22  | 0.01       | 5.09  | 0.01       |
| L10      | 7.76  | 0.01       | 7.78  | 0.01       | 5.58  | 0.05       |

**Table S3** The dynamic viscosity of the medium calculated by Einstein-Stokes relation (cP)

| Layer ID | $\eta_x$ | $Err. \eta_x$ | $\eta_y$ | $Err. \eta_y$ | $\eta_z$ | $Err. \eta_z$ |
|----------|----------|---------------|----------|---------------|----------|---------------|
| L1       | 0.22     | 0.00          | 0.22     | 0.00          | 0.30     | 0.00          |
| L2       | 0.24     | 0.00          | 0.24     | 0.00          | 0.36     | 0.00          |
| L3       | 0.44     | 0.01          | 0.44     | 0.01          | 0.79     | 0.03          |
| L8       | 0.36     | 0.01          | 0.35     | 0.01          | 0.60     | 0.01          |
| L9       | 0.23     | 0.00          | 0.23     | 0.00          | 0.33     | 0.00          |
| L10      | 0.22     | 0.00          | 0.22     | 0.00          | 0.30     | 0.00          |
